# Supplementary material for: Mesoporous Silicon Microparticles Enhance MHC Class I Cross-Antigen Presentation by Human Dendritic Cells
Source: Clin Dev Immunol. 2013 Nov 10;2013:362163. doi: 10.1155/2013/362163 (PMC3842076; doi:10.1155/2013/362163)

#### Supplementary Material; Eq. 1

##### - Porosity

Porosity of the used porous silicon material was determined gravimetrically using the equation:

$$P(\%) = \frac{m_1 - m_3}{m_1 - m_2} \quad (1)$$

Where  $m_1$  is the mass of the initial Si wafer used for anodizing (porosification),  $m_2$  is the mass of the Si wafer after anodizing and  $m_3$  is the mass of the remnant wafer after removing the porous layer by scratching and cleaning in 1M KOH solution. Porous material is completely eliminated from the wafer in these conditions.

# Supplementary Material; Figure S1

## - MS-MPs are free of endotoxin.

Mesoporous Silicon microparticles ( $1 \times 10^7$ ) and CEF pp pool (0,5  $\mu\text{g/ml}$ ) were tested for endotoxin activity using chromogenic LAL assay. LPS (1  $\mu\text{g/ml}$ ) was included as a positive control and a sample blank included in the kit as a negative control. \*\*\* $P < .01$ .

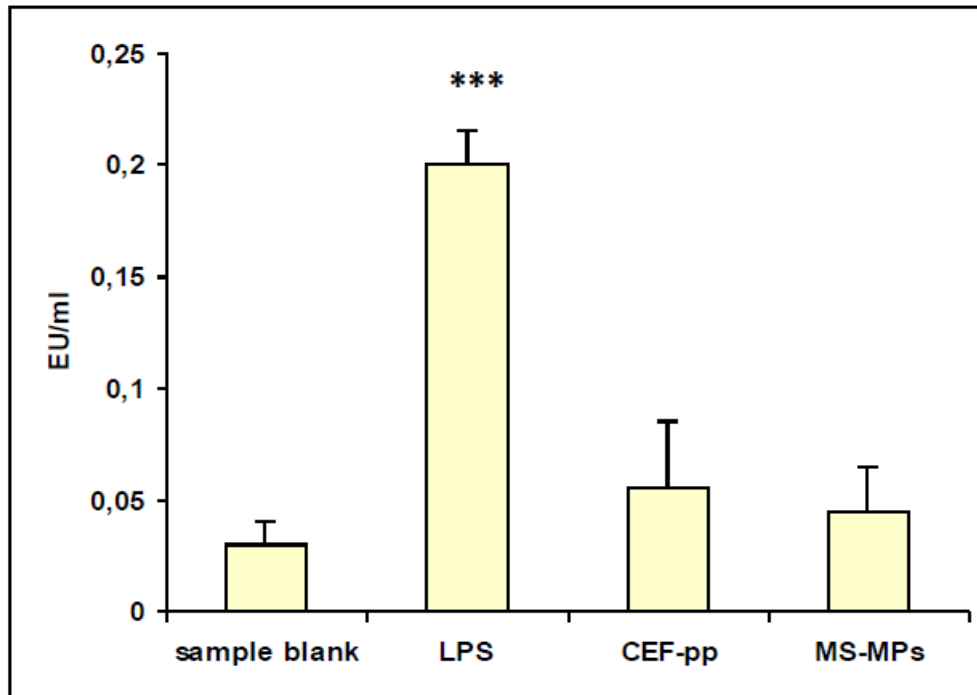

**Supplementary Material; Figure S2**

**Internalization of MSMPs by flow cytometry.**

A representative example of Forward (FSC) and Size (SSC) flow cytometry parameters to measure microparticle uptake by MDDCs at 24 h. Histograms (up) and mean counts (down) (D).

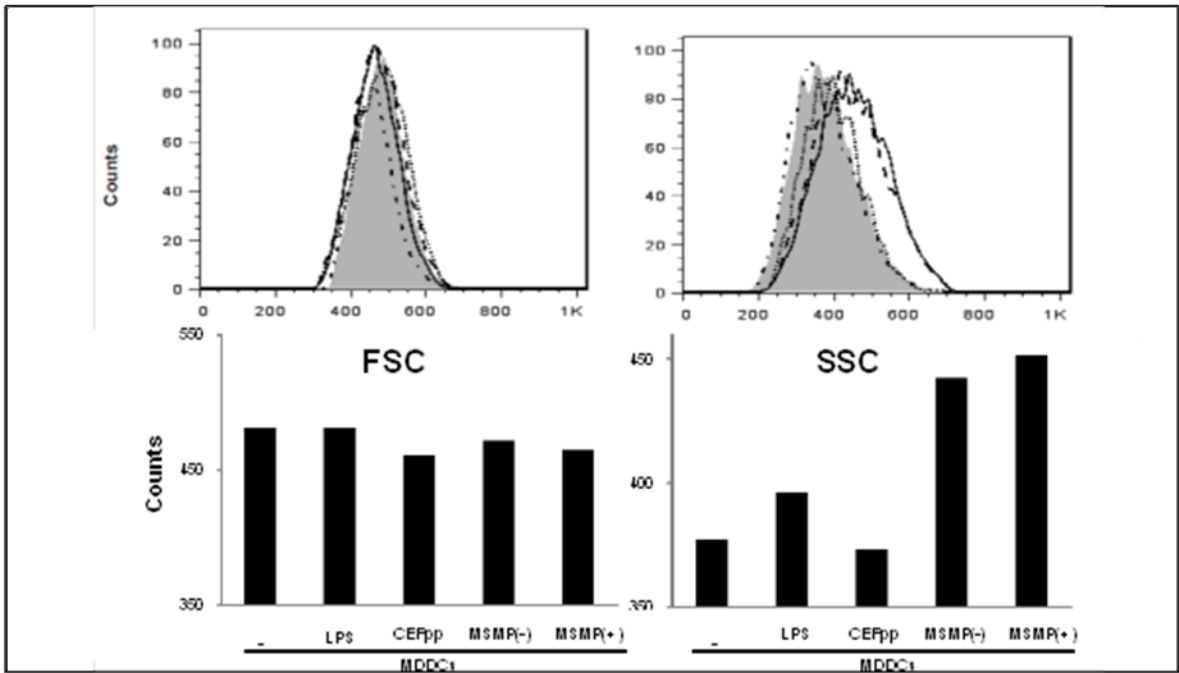

Supplement: Supplementary file 1 — Equation to calculate porosity of MSMPs; Endotoxin test and a representative example of flow cytometry parameters to measure MSMPs uptake by MDDCs are included in supplementary material. [file 362163.f1.pdf]
